# Supplementary material for: Gut-derived lipopolysaccharide augments adipose macrophage accumulation but is not essential for impaired glucose or insulin tolerance in mice
Source: PubMed Central journal article supplement — Gut. 2012 Apr 25;61(12):1701–7. doi: 10.1136/gutjnl-2011-301689 (PMC3505865; doi:10.1136/gutjnl-2011-301689), 2012-04-25
Supplement: gutjnl-2011-301689-s1.pdf [file gutjnl-2011-301689-s1.pdf]

## **Supplementary material to:**

### **Gut-derived lipopolysaccharide augments adipose macrophage accumulation but is not essential for impaired glucose or insulin tolerance in mice**

Robert Caesar<sup>1,2</sup>, Christopher S. Reigstad<sup>1,2</sup>, Helene Kling Bäckhed<sup>1,2</sup>, Christoph Reinhardt<sup>1,2</sup>,  
Maria Ketonen<sup>1,2</sup>, Gunnel Östergren Lundén<sup>1,2</sup>, Patrice D. Cani<sup>3</sup>, Fredrik Bäckhed<sup>1,2\*</sup>

Content:

Figures S1-3

Tables: S1-2

Figure S1

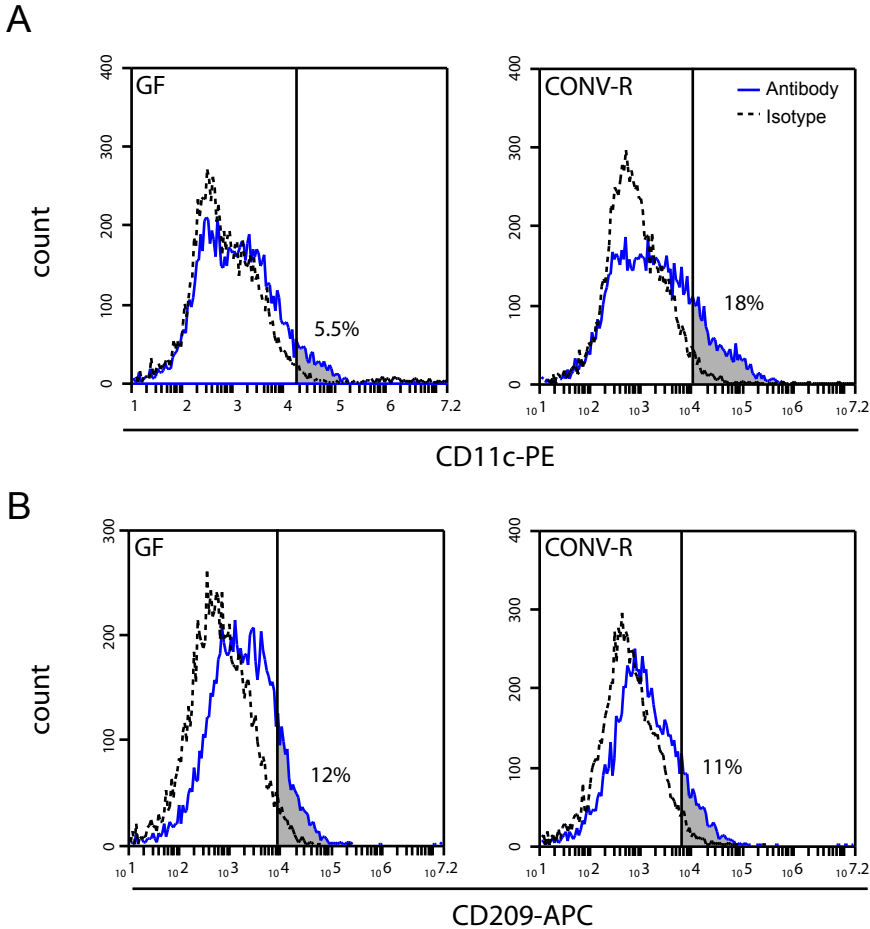

**Figure S1. Flow cytometry analysis of CD11c and CD209 of WAT macrophages from GF and CONV-R mice.** Flow cytometry analysis of (A) CD11c+ and (B) CD209+ macrophages isolated from epididymal WAT of GF or CONV-R mice. Data from representative samples are shown. Gray areas indicate cells positive for CD11c and CD209.

Figure S2

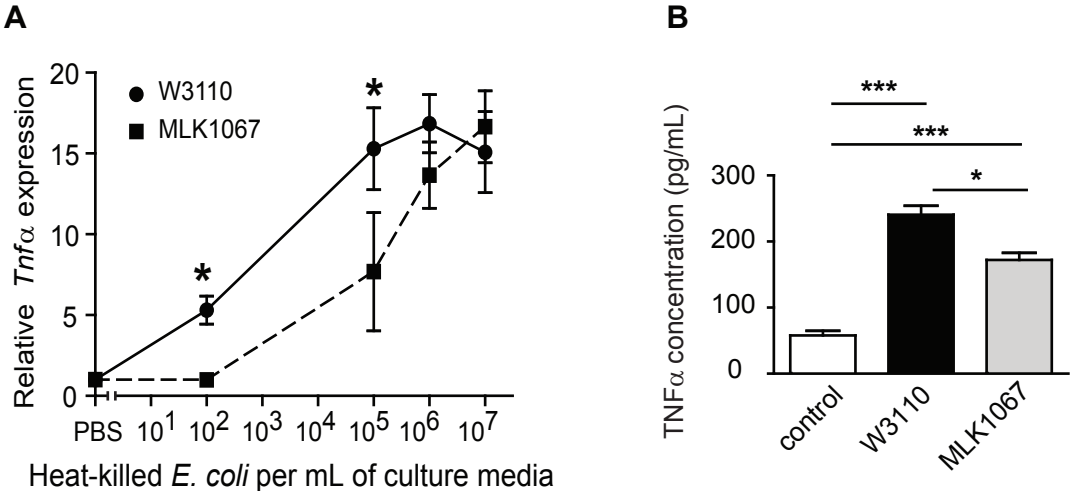

**Figure S2. TNF $\alpha$  expression and secretion in RAW 267.7 macrophages after exposure to heat-killed *E. coli*.** (A) Cells were stimulated with various concentrations of either wildtype *E. coli* or the isogenic mutant MLK1067 for 1 h and gene expression of *Tnf $\alpha$*  was determined by q-PCR. (n = 4; 2 independent experiments). (B) Cells were stimulated with 100 heat-killed *E. coli* per mL for 4 h and abundance of TNF $\alpha$  in the supernatant was determined by Mesoscale immune-analysis (n = 3). Mean values  $\pm$  SEM are plotted; \* $P$  < 0.05, \*\*\* $P$  < 0.001.

Figure S3

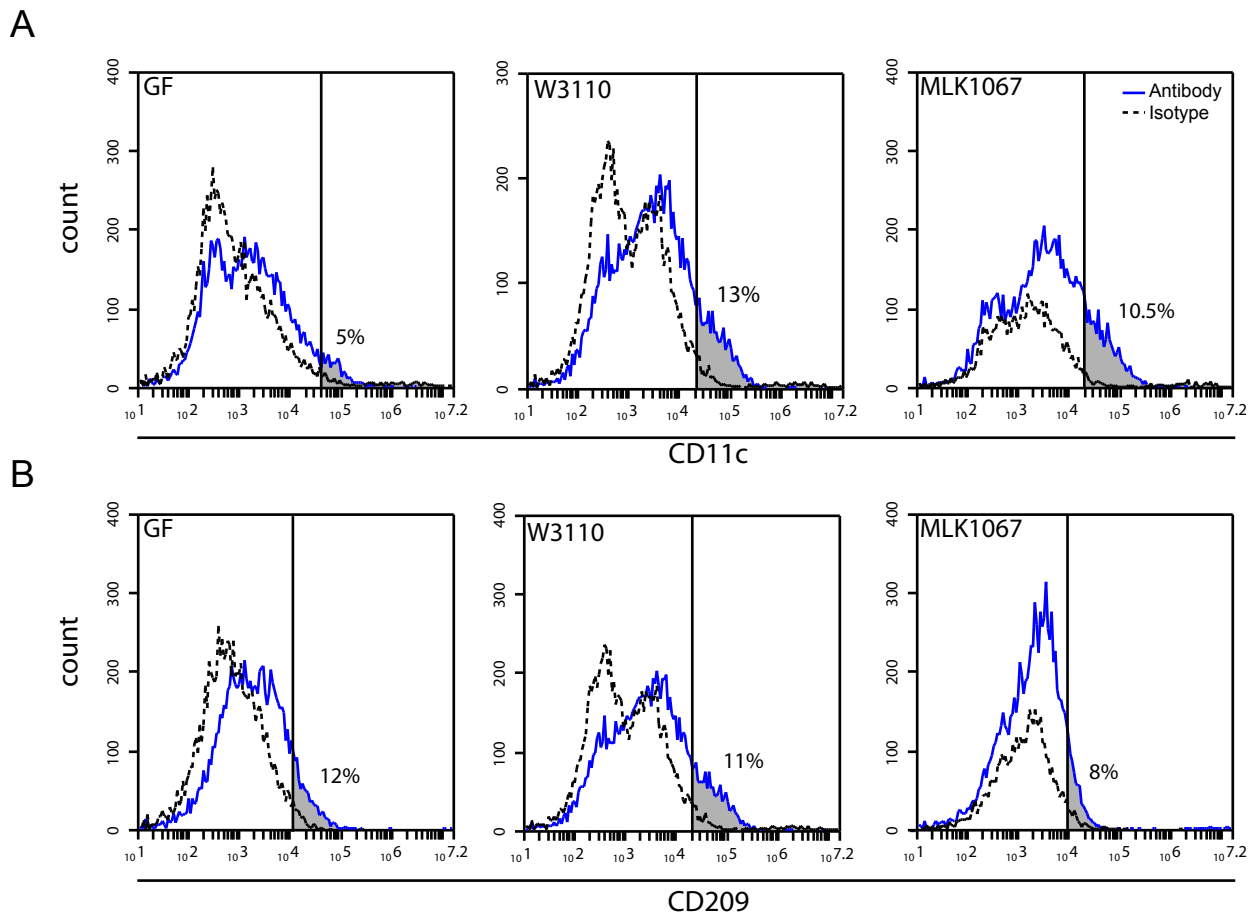

**Figure S3. Flow cytometry analysis of CD11c and CD209 on WAT macrophages from GF mice and mice colonized with *E. coli* W3110 or MLK1067.** Flow cytometry analysis of (A) CD11c<sup>+</sup> and (B) CD209<sup>+</sup> macrophages isolated from epididymal WAT of GF mice and mice colonized with *E. coli* W3110 or MLK1067. Data from representative samples are shown. Gray areas indicate cells positive for CD11c or CD209.

Table S1. List of antibodies

Primary antibodies:

| Target protein   | Product ID  | Manufacturer                                |
|------------------|-------------|---------------------------------------------|
| JNK              | 9252        | Cell Signaling, Danvers, MA                 |
| JNK-P            | 4668P       | Cell Signaling, Danvers, MA                 |
| Actin            | Sc1615      | Santa Cruz Biotechnology, Santa Cruz, CA    |
| CD11c-PE         | 130-091-830 | Miltenyi Biotec, Bergisch Gladbach, Germany |
| CD209-APC        | 17-2092-80  | e-bioscience, San Diego, CA                 |
| MAC-2/galectin-3 | CL8942AP    | Cedarlane Laboratories, Burlington, ON      |

Secondary antibodies:

| Description                      | Product ID | Manufacturer                             |
|----------------------------------|------------|------------------------------------------|
| goat anti-rabbit IgG-HRP         | Sc-2054    | Santa Cruz Biotechnology, Santa Cruz, CA |
| donkey anti-goat IgG-HRP         | Sc-2056    | Santa Cruz Biotechnology, Santa Cruz, CA |
| rabbit biotinylated anti-rat IgG | VEBA-4001  | Vector lab, Burlingame, CA               |

Isotype controls:

| Description              | Product ID | Manufacturer                             |
|--------------------------|------------|------------------------------------------|
| IgG-PE, Armenian Hamster | Sc-2875    | Santa Cruz Biotechnology, Santa Cruz, CA |
| IgG2a $\kappa$ -APC, Rat | 174321-41  | e-bioscience, San Diego, CA              |
| IgG2B-PE, Rat            | IC013P     | R&D Systems, McKinley Place, MN          |

Table S2. List of primers

| Gene         | Direction | Sequence                |
|--------------|-----------|-------------------------|
| <i>Emr1</i>  | Forward   | TGACAACCAGACGGCTTGTG    |
| <i>Emr1</i>  | Reverse   | GCAGGCGAGGAAAAGATAGTGT  |
| <i>Tnfa</i>  | Forward   | CCAGACCCTCACACTCA       |
| <i>Tnfa</i>  | Reverse   | CACTTGGTGGTTTGCTACGAC   |
| <i>Mlg1</i>  | Forward   | TGAGAAAGGCTTTAAGAACTGGG |
| <i>Mlg1</i>  | Reverse   | GACCACCTGTAGTGATGTGGG   |
| <i>Il-10</i> | Forward   | AAGGACCAGCTGGACAACAT    |
| <i>Il-10</i> | Reverse   | TCTCACCCAGGGAATTCAAA    |
| <i>Saa3</i>  | Forward   | TGCCATCATTCTTTGCATCTTGA |
| <i>Saa3</i>  | Reverse   | CCGTGAACTTCTGAACAGCCT   |
